# Supplementary material
Source: publisher figshare collection journal article supplement (https://gsapubs.figshare.com/ndownloader/files/22756403)
Supplement: Supplementary file 1 [file 22756403]

**Table DR1. Langdun Formation lithologic data**

|                                  | Site LC1 | Site LC8 | Site ASC9 |
|----------------------------------|----------|----------|-----------|
| Gneiss/leucogranite <sup>1</sup> | 0.00     | 0.00     | 0.37      |
| Black/gray limestone             | 0.07     | 0.69     | 0.05      |
| Basalt                           | 0.02     | 0.00     | 0.05      |
| Sandstone/siltstone              | 0.76     | 0.28     | 0.53      |
| Conglomerate                     | 0.00     | 0.03     | 0.00      |
| Purple siltstone                 | 0.02     | 0.00     | 0.00      |
| Purple sandstone                 | 0.13     | 0.00     | 0.00      |

Note: Data given as fraction of total. Data collected through random selection of ~50 clasts at each site. Gneiss/leucogranites derive from the Ailao Shan shear zone. Other lithologic associations are as follows: Black and gray limestone = Triassic (T<sub>2</sub>); Basalt = Permian; Conglomerate = Limestone Conglomerate member of the Langdun formation; Purple siltstone = Devonian; Purple sandstone = Sinian (Bureau of Geology, Yunnan, 1990). Sandstones and siltstones could derive from a variety of units and can't be further identified. See figure 6 for locations.
